# Supplementary material for: Comparative Genomics of the Balsaminaceae Sister Genera Hydrocera triflora and Impatiens pinfanensis
Source: MDPI journal article supplement (doi:10.3390/ijms19010319), 2018-01-23
Supplement: s1 [file s1]

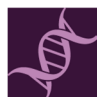

**Table S1.** The calculated parameter values for PCG in *I. pinfanensis*

| Title | T3s    | C3s    | A3s    | G3s    | CAI   | CBI    | Fop   | Nc    | GC3s  | GC    | L_sym | L_aa | Gravy    | Aromo    |
|-------|--------|--------|--------|--------|-------|--------|-------|-------|-------|-------|-------|------|----------|----------|
| psbA  | 0.5263 | 0.2336 | 0.3175 | 0.0905 | 0.296 | 0.195  | 0.532 | 41.91 | 0.275 | 0.418 | 331   | 353  | 0.34136  | 0.135977 |
| matK  | 0.4757 | 0.1514 | 0.4551 | 0.1854 | 0.161 | -0.113 | 0.345 | 48.39 | 0.255 | 0.333 | 220   | 232  | -0.19009 | 0.146552 |
| atpA  | 0.4937 | 0.1385 | 0.4219 | 0.1684 | 0.192 | -0.058 | 0.383 | 47.04 | 0.24  | 0.396 | 496   | 507  | -0.06312 | 0.059172 |
| atpF  | 0.4771 | 0.1569 | 0.4694 | 0.1908 | 0.15  | -0.167 | 0.325 | 47.01 | 0.257 | 0.36  | 191   | 198  | -0.3303  | 0.085859 |
| atpI  | 0.4906 | 0.1651 | 0.4115 | 0.1198 | 0.156 | -0.09  | 0.34  | 40.55 | 0.231 | 0.372 | 238   | 247  | 0.72834  | 0.121457 |
| rps2  | 0.5077 | 0.1128 | 0.4509 | 0.1533 | 0.161 | -0.164 | 0.32  | 43.82 | 0.203 | 0.371 | 222   | 236  | -0.23559 | 0.072034 |
| rpoC2 | 0.4695 | 0.1415 | 0.4603 | 0.1865 | 0.14  | -0.186 | 0.304 | 47.58 | 0.245 | 0.361 | 1349  | 1385 | -0.22563 | 0.083032 |
| rpoC1 | 0.4762 | 0.1499 | 0.4615 | 0.1762 | 0.147 | -0.143 | 0.323 | 49.7  | 0.246 | 0.383 | 684   | 707  | -0.28458 | 0.09901  |
| rpoB  | 0.4638 | 0.1133 | 0.4613 | 0.2219 | 0.147 | -0.141 | 0.329 | 48.11 | 0.25  | 0.385 | 1037  | 1070 | -0.25346 | 0.08785  |
| psbD  | 0.5151 | 0.194  | 0.351  | 0.1422 | 0.254 | 0.068  | 0.456 | 45.99 | 0.275 | 0.425 | 331   | 353  | 0.364873 | 0.169972 |
| psbC  | 0.4716 | 0.1778 | 0.3864 | 0.1498 | 0.187 | -0.037 | 0.388 | 44.78 | 0.27  | 0.434 | 448   | 473  | 0.245877 | 0.143763 |
| rps14 | 0.4026 | 0.1299 | 0.4375 | 0.2667 | 0.142 | -0.054 | 0.385 | 45.57 | 0.313 | 0.423 | 96    | 100  | -1.033   | 0.06     |
| psaB  | 0.5104 | 0.1579 | 0.3691 | 0.1749 | 0.183 | -0.114 | 0.351 | 47.52 | 0.261 | 0.407 | 689   | 734  | 0.128883 | 0.148501 |
| psaA  | 0.4829 | 0.1801 | 0.3978 | 0.1375 | 0.201 | -0.077 | 0.371 | 47.52 | 0.257 | 0.418 | 707   | 750  | 0.241733 | 0.132    |
| ycf3  | 0.4925 | 0.1493 | 0.4701 | 0.198  | 0.142 | -0.229 | 0.304 | 54.84 | 0.248 | 0.377 | 161   | 168  | -0.48571 | 0.142857 |
| rps4  | 0.4843 | 0.1321 | 0.4688 | 0.1655 | 0.152 | -0.025 | 0.386 | 49.12 | 0.228 | 0.371 | 197   | 201  | -0.64925 | 0.069652 |
| ndhJ  | 0.5    | 0.1587 | 0.4091 | 0.2165 | 0.162 | -0.203 | 0.289 | 51.34 | 0.275 | 0.397 | 149   | 158  | -0.26076 | 0.14557  |
| ndhK  | 0.5365 | 0.1245 | 0.4286 | 0.1489 | 0.171 | -0.177 | 0.316 | 46.42 | 0.21  | 0.363 | 272   | 283  | -0.24311 | 0.102474 |
| ndhC  | 0.55   | 0.11   | 0.3953 | 0.1507 | 0.195 | -0.052 | 0.36  | 43.92 | 0.198 | 0.35  | 111   | 120  | 1.068333 | 0.216667 |
| atpE  | 0.5093 | 0.1389 | 0.4259 | 0.1383 | 0.17  | -0.068 | 0.364 | 46.22 | 0.217 | 0.383 | 129   | 135  | -0.09407 | 0.022222 |
| atpB  | 0.4619 | 0.1597 | 0.4163 | 0.164  | 0.204 | 0.004  | 0.414 | 47.24 | 0.261 | 0.42  | 483   | 498  | -0.00602 | 0.062249 |
| rbcL  | 0.4961 | 0.1877 | 0.3775 | 0.1747 | 0.273 | 0.074  | 0.465 | 48.4  | 0.286 | 0.443 | 458   | 475  | -0.28442 | 0.098947 |
| accD  | 0.5812 | 0.1548 | 0.354  | 0.2112 | 0.179 | -0.205 | 0.314 | 47.24 | 0.264 | 0.349 | 474   | 496  | -0.50887 | 0.106855 |
| ycf4  | 0.5099 | 0.1589 | 0.4275 | 0.1293 | 0.157 | -0.083 | 0.36  | 44.44 | 0.223 | 0.368 | 175   | 184  | 0.233152 | 0.163043 |
| cemA  | 0.5333 | 0.1611 | 0.4671 | 0.1508 | 0.18  | -0.142 | 0.33  | 48.76 | 0.223 | 0.304 | 215   | 229  | 0.162446 | 0.152838 |

|       |        |        |        |        |       |        |       |       |       |       |      |      |          |          |
|-------|--------|--------|--------|--------|-------|--------|-------|-------|-------|-------|------|------|----------|----------|
| petA  | 0.5391 | 0.125  | 0.3891 | 0.1947 | 0.182 | -0.096 | 0.35  | 46.57 | 0.242 | 0.382 | 314  | 320  | -0.0825  | 0.078125 |
| rps18 | 0.5063 | 0.0759 | 0.4881 | 0.16   | 0.098 | -0.241 | 0.263 | 41.82 | 0.182 | 0.34  | 99   | 101  | -0.82574 | 0.069307 |
| rpl20 | 0.4554 | 0.1089 | 0.4457 | 0.2078 | 0.092 | -0.206 | 0.281 | 47.43 | 0.237 | 0.368 | 114  | 117  | -0.56239 | 0.076923 |
| clpP  | 0.4581 | 0.1935 | 0.4497 | 0.1119 | 0.197 | -0.076 | 0.361 | 52.87 | 0.246 | 0.412 | 183  | 194  | 0.137113 | 0.092784 |
| psbB  | 0.5069 | 0.1544 | 0.379  | 0.1536 | 0.193 | -0.066 | 0.378 | 46.49 | 0.249 | 0.434 | 481  | 508  | 0.135827 | 0.145669 |
| petB  | 0.5191 | 0.1694 | 0.3598 | 0.12   | 0.224 | -0.002 | 0.399 | 40.23 | 0.241 | 0.397 | 203  | 219  | 0.526941 | 0.141553 |
| petD  | 0.4803 | 0.1053 | 0.4928 | 0.1048 | 0.174 | -0.125 | 0.306 | 37.1  | 0.171 | 0.365 | 170  | 178  | 0.496629 | 0.11236  |
| rpoA  | 0.4764 | 0.1527 | 0.5117 | 0.1727 | 0.152 | -0.141 | 0.327 | 49.46 | 0.234 | 0.323 | 342  | 352  | -0.26477 | 0.085227 |
| rps11 | 0.4793 | 0.0909 | 0.4435 | 0.1238 | 0.157 | -0.104 | 0.353 | 48.04 | 0.18  | 0.437 | 133  | 138  | -0.41884 | 0.036232 |
| rps8  | 0.4018 | 0.1964 | 0.4717 | 0.1379 | 0.111 | -0.017 | 0.395 | 42.45 | 0.264 | 0.366 | 129  | 134  | -0.40299 | 0.059701 |
| rpl14 | 0.49   | 0.15   | 0.4227 | 0.1566 | 0.183 | -0.016 | 0.39  | 49.22 | 0.237 | 0.399 | 118  | 122  | -0.0582  | 0.040984 |
| rpl16 | 0.4316 | 0.1158 | 0.52   | 0.1059 | 0.141 | -0.023 | 0.407 | 42.21 | 0.177 | 0.417 | 113  | 120  | -0.22333 | 0.083333 |
| rps3  | 0.3865 | 0.2209 | 0.5774 | 0.0956 | 0.154 | -0.064 | 0.383 | 47.95 | 0.234 | 0.349 | 209  | 218  | -0.38395 | 0.091743 |
| rpl22 | 0.4757 | 0.1165 | 0.5392 | 0.1163 | 0.143 | -0.184 | 0.31  | 41.52 | 0.175 | 0.328 | 126  | 129  | -0.34264 | 0.077519 |
| rpl2  | 0.3906 | 0.2017 | 0.4163 | 0.195  | 0.14  | -0.097 | 0.357 | 53.19 | 0.32  | 0.44  | 269  | 275  | -0.61927 | 0.047273 |
| ycf2  | 0.435  | 0.2164 | 0.3977 | 0.2599 | 0.159 | -0.123 | 0.346 | 53.02 | 0.349 | 0.381 | 2172 | 2265 | -0.4494  | 0.122737 |
| ndhB  | 0.4286 | 0.2177 | 0.4316 | 0.121  | 0.161 | -0.091 | 0.351 | 47.97 | 0.277 | 0.373 | 484  | 510  | 0.677255 | 0.129412 |
| rps7  | 0.425  | 0.1333 | 0.5194 | 0.1282 | 0.186 | -0.065 | 0.383 | 45.95 | 0.208 | 0.406 | 149  | 155  | -0.54516 | 0.045161 |
| ndhF  | 0.5433 | 0.1181 | 0.4369 | 0.129  | 0.152 | -0.17  | 0.303 | 44.34 | 0.188 | 0.314 | 702  | 739  | 0.5682   | 0.161028 |
| ccsA  | 0.5131 | 0.1011 | 0.5092 | 0.116  | 0.136 | -0.261 | 0.257 | 43.72 | 0.162 | 0.3   | 296  | 312  | 0.588141 | 0.166667 |
| ndhD  | 0.4755 | 0.1538 | 0.4731 | 0.0952 | 0.138 | -0.153 | 0.312 | 44    | 0.202 | 0.335 | 465  | 500  | 0.7392   | 0.164    |
| ndhE  | 0.5455 | 0.1477 | 0.4342 | 0.0469 | 0.164 | -0.172 | 0.299 | 40.44 | 0.165 | 0.31  | 97   | 101  | 0.788119 | 0.089109 |
| ndhG  | 0.5062 | 0.1125 | 0.4308 | 0.1442 | 0.128 | -0.263 | 0.235 | 47.55 | 0.194 | 0.326 | 170  | 176  | 1.090341 | 0.136364 |
| ndhI  | 0.5    | 0.1691 | 0.4602 | 0.1563 | 0.194 | -0.092 | 0.361 | 47.25 | 0.241 | 0.354 | 158  | 165  | -0.0497  | 0.115152 |
| ndhA  | 0.4662 | 0.0997 | 0.5    | 0.1098 | 0.116 | -0.176 | 0.28  | 41.73 | 0.167 | 0.33  | 347  | 361  | 0.755125 | 0.132964 |
| ndhH  | 0.4886 | 0.1205 | 0.5139 | 0.1341 | 0.148 | -0.14  | 0.323 | 46.21 | 0.19  | 0.369 | 368  | 393  | -0.13868 | 0.114504 |
| ycf1  | 0.4882 | 0.159  | 0.5652 | 0.149  | 0.152 | -0.133 | 0.343 | 45.88 | 0.215 | 0.277 | 1779 | 1840 | -0.55114 | 0.127717 |

**Table S2.** The calculated parameter values for each PCG in *H. triflora*

| Title        | T3s    | C3s    | A3s    | G3s    | CAI   | CBI    | Fop   | Nc           | GC3s  | GC    | L_sym | L_aa | Gravy    | Aromo    |
|--------------|--------|--------|--------|--------|-------|--------|-------|--------------|-------|-------|-------|------|----------|----------|
| psbA         | 0.5296 | 0.2401 | 0.3135 | 0.0811 | 0.302 | 0.211  | 0.541 | 41.52        | 0.275 | 0.418 | 331   | 353  | 0.334278 | 0.135977 |
| matK         | 0.5062 | 0.1414 | 0.5014 | 0.164  | 0.161 | -0.144 | 0.327 | 46           | 0.222 | 0.311 | 486   | 503  | -0.14573 | 0.15507  |
| atpA         | 0.4962 | 0.1392 | 0.4219 | 0.1684 | 0.198 | -0.044 | 0.391 | 48.15        | 0.24  | 0.398 | 496   | 507  | -0.08935 | 0.059172 |
| atpF         | 0.4516 | 0.1548 | 0.46   | 0.2222 | 0.146 | -0.168 | 0.321 | 41.07        | 0.28  | 0.367 | 193   | 198  | -0.30556 | 0.070707 |
| atpI         | 0.5024 | 0.1517 | 0.4301 | 0.1012 | 0.158 | -0.084 | 0.345 | 42.29        | 0.206 | 0.364 | 238   | 247  | 0.705263 | 0.121457 |
| rps2         | 0.5206 | 0.1082 | 0.4335 | 0.1645 | 0.181 | -0.1   | 0.356 | 45.58        | 0.207 | 0.377 | 222   | 236  | -0.22119 | 0.072034 |
| rpoC2        | 0.4541 | 0.152  | 0.4494 | 0.1998 | 0.139 | -0.176 | 0.31  | 49.16        | 0.265 | 0.37  | 1353  | 1386 | -0.23961 | 0.078644 |
| rpoC1        | 0.483  | 0.1485 | 0.4575 | 0.1816 | 0.15  | -0.143 | 0.324 | 49.19        | 0.247 | 0.385 | 673   | 696  | -0.32974 | 0.097701 |
| rpoB         | 0.4637 | 0.1124 | 0.4554 | 0.2252 | 0.144 | -0.153 | 0.321 | 48.24        | 0.253 | 0.388 | 1036  | 1070 | -0.27907 | 0.082243 |
| psbD         | 0.51   | 0.2067 | 0.332  | 0.1522 | 0.246 | 0.063  | 0.453 | 46.72        | 0.293 | 0.432 | 331   | 353  | 0.365722 | 0.169972 |
| psbC         | 0.4691 | 0.1827 | 0.3842 | 0.1459 | 0.187 | -0.024 | 0.395 | 44.53        | 0.272 | 0.435 | 448   | 473  | 0.257928 | 0.139535 |
| rps14        | 0.4079 | 0.1184 | 0.4444 | 0.2632 | 0.14  | -0.075 | 0.375 | 44.46        | 0.302 | 0.42  | 96    | 100  | -0.995   | 0.06     |
| psaB         | 0.5152 | 0.1531 | 0.3601 | 0.1861 | 0.185 | -0.107 | 0.356 | 47.74        | 0.264 | 0.41  | 689   | 734  | 0.130518 | 0.149864 |
| psaA         | 0.4736 | 0.1817 | 0.3915 | 0.1538 | 0.205 | -0.075 | 0.372 | 48.44        | 0.27  | 0.424 | 707   | 750  | 0.251733 | 0.132    |
| ycf3         | 0.4853 | 0.1544 | 0.4701 | 0.198  | 0.146 | -0.208 | 0.315 | 53.38        | 0.253 | 0.381 | 162   | 169  | -0.44497 | 0.142012 |
| rps4         | 0.4904 | 0.1401 | 0.4688 | 0.1586 | 0.164 | 0.008  | 0.406 | 48.22        | 0.228 | 0.37  | 197   | 201  | -0.62836 | 0.074627 |
| ndhJ         | 0.5079 | 0.1587 | 0.422  | 0.1979 | 0.161 | -0.207 | 0.289 | 46.69        | 0.262 | 0.388 | 149   | 158  | -0.29684 | 0.14557  |
| ndhK         | 0.5193 | 0.1288 | 0.4375 | 0.1568 | 0.155 | -0.21  | 0.295 | 47.03        | 0.218 | 0.365 | 271   | 282  | -0.19504 | 0.102837 |
| ndhC         | 0.52   | 0.15   | 0.407  | 0.1233 | 0.202 | 0.007  | 0.396 | 45.47        | 0.216 | 0.353 | 111   | 120  | 1.0475   | 0.216667 |
| atpE         | 0.5    | 0.1509 | 0.3925 | 0.1739 | 0.16  | -0.099 | 0.346 | 46.88        | 0.252 | 0.388 | 127   | 133  | 0.013534 | 0.022556 |
| atpB         | 0.4545 | 0.1671 | 0.4113 | 0.1689 | 0.205 | -0.002 | 0.41  | 47.6         | 0.271 | 0.424 | 483   | 498  | -0.01847 | 0.060241 |
| rbcL         | 0.5168 | 0.1731 | 0.3881 | 0.1566 | 0.272 | 0.057  | 0.456 | 47.26        | 0.261 | 0.436 | 456   | 475  | -0.288   | 0.098947 |
| accD         | 0.5954 | 0.1603 | 0.349  | 0.2033 | 0.197 | -0.182 | 0.329 | 48.07        | 0.26  | 0.341 | 477   | 498  | -0.45763 | 0.110442 |
| ycf4         | 0.4967 | 0.1569 | 0.4214 | 0.1441 | 0.156 | -0.08  | 0.358 | 44.95        | 0.233 | 0.373 | 176   | 184  | 0.251087 | 0.163043 |
| cemA         | 0.5193 | 0.1713 | 0.4459 | 0.1628 | 0.175 | -0.147 | 0.324 | 44.45        | 0.241 | 0.311 | 216   | 229  | 0.233188 | 0.152838 |
| petA         | 0.5315 | 0.1457 | 0.3789 | 0.1921 | 0.203 | -0.037 | 0.387 | 46.36        | 0.259 | 0.394 | 313   | 320  | -0.10344 | 0.08125  |
| <b>rps18</b> | 0.5185 | 0.0741 | 0.4819 | 0.1486 | 0.093 | -0.224 | 0.273 | <b>32.11</b> | 0.172 | 0.327 | 99    | 101  | -0.88416 | 0.079208 |

|             |        |        |        |        |       |        |       |              |       |       |      |      |          |          |
|-------------|--------|--------|--------|--------|-------|--------|-------|--------------|-------|-------|------|------|----------|----------|
| rpl20       | 0.45   | 0.13   | 0.413  | 0.2179 | 0.104 | -0.157 | 0.31  | 48.61        | 0.265 | 0.379 | 113  | 117  | -0.4906  | 0.08547  |
| clpP        | 0.471  | 0.1613 | 0.4631 | 0.1231 | 0.19  | -0.087 | 0.355 | 52.14        | 0.224 | 0.402 | 183  | 194  | 0.154124 | 0.092784 |
| psbB        | 0.5161 | 0.1382 | 0.3673 | 0.1729 | 0.197 | -0.062 | 0.38  | 46.99        | 0.249 | 0.437 | 481  | 508  | 0.109842 | 0.145669 |
| petB        | 0.5304 | 0.1547 | 0.362  | 0.1208 | 0.219 | -0.01  | 0.393 | 40.42        | 0.229 | 0.396 | 201  | 217  | 0.552996 | 0.138249 |
| petD        | 0.4733 | 0.1133 | 0.4593 | 0.1301 | 0.165 | -0.128 | 0.301 | 42.45        | 0.199 | 0.377 | 166  | 174  | 0.513218 | 0.109195 |
| rpoA        | 0.4674 | 0.1571 | 0.5021 | 0.177  | 0.151 | -0.152 | 0.323 | 48.63        | 0.242 | 0.339 | 322  | 329  | -0.31337 | 0.091185 |
| rps11       | 0.4672 | 0.0902 | 0.4138 | 0.1698 | 0.16  | -0.067 | 0.373 | 48.23        | 0.216 | 0.449 | 134  | 138  | -0.38406 | 0.036232 |
| rps8        | 0.4298 | 0.1754 | 0.4808 | 0.119  | 0.113 | -0.038 | 0.38  | 40.77        | 0.233 | 0.353 | 129  | 134  | -0.34179 | 0.059701 |
| rpl14       | 0.4554 | 0.1584 | 0.4583 | 0.1463 | 0.165 | -0.046 | 0.373 | 48.23        | 0.237 | 0.396 | 118  | 122  | -0.03279 | 0.040984 |
| rpl16       | 0.4074 | 0.1574 | 0.5    | 0.1134 | 0.149 | 0.015  | 0.43  | 40.14        | 0.219 | 0.431 | 128  | 136  | -0.46103 | 0.080882 |
| rps3        | 0.3963 | 0.2134 | 0.5789 | 0.0876 | 0.151 | -0.099 | 0.36  | 48.27        | 0.223 | 0.343 | 211  | 218  | -0.34358 | 0.091743 |
| rpl22       | 0.4712 | 0.0769 | 0.534  | 0.1444 | 0.128 | -0.233 | 0.272 | 45.33        | 0.168 | 0.354 | 125  | 129  | -0.27907 | 0.062016 |
| <b>rpl2</b> | 0.3922 | 0.2069 | 0.4182 | 0.1859 | 0.143 | -0.093 | 0.362 | <b>54.24</b> | 0.317 | 0.442 | 268  | 275  | -0.65309 | 0.050909 |
| ycf2        | 0.4337 | 0.218  | 0.3967 | 0.2627 | 0.159 | -0.118 | 0.349 | 52.96        | 0.351 | 0.38  | 2167 | 2260 | -0.45288 | 0.123894 |
| ndhB        | 0.4282 | 0.221  | 0.434  | 0.1154 | 0.163 | -0.089 | 0.353 | 47.91        | 0.276 | 0.374 | 482  | 510  | 0.676667 | 0.131373 |
| rps7        | 0.425  | 0.1333 | 0.5194 | 0.1282 | 0.186 | -0.065 | 0.383 | 45.95        | 0.208 | 0.406 | 149  | 155  | -0.54516 | 0.045161 |
| ndhF        | 0.5272 | 0.1244 | 0.4316 | 0.1409 | 0.147 | -0.174 | 0.302 | 44.7         | 0.202 | 0.321 | 709  | 741  | 0.572875 | 0.148448 |
| ccsA        | 0.4944 | 0.1124 | 0.5    | 0.1183 | 0.142 | -0.243 | 0.264 | 43.16        | 0.176 | 0.303 | 296  | 312  | 0.648718 | 0.163462 |
| ndhD        | 0.4792 | 0.1366 | 0.4789 | 0.1047 | 0.132 | -0.193 | 0.287 | 43.77        | 0.193 | 0.34  | 467  | 500  | 0.751    | 0.162    |
| ndhE        | 0.5517 | 0.1379 | 0.4    | 0.1111 | 0.172 | -0.145 | 0.32  | 48.41        | 0.196 | 0.32  | 97   | 101  | 0.751485 | 0.09901  |
| ndhG        | 0.5093 | 0.118  | 0.4135 | 0.1402 | 0.132 | -0.255 | 0.24  | 46.99        | 0.199 | 0.33  | 171  | 176  | 1.113636 | 0.130682 |
| ndhI        | 0.5185 | 0.163  | 0.4455 | 0.1702 | 0.192 | -0.124 | 0.344 | 46.38        | 0.242 | 0.358 | 157  | 165  | -0.07455 | 0.121212 |
| ndhA        | 0.471  | 0.1    | 0.4844 | 0.1174 | 0.127 | -0.153 | 0.298 | 43.53        | 0.173 | 0.338 | 346  | 361  | 0.73518  | 0.130194 |
| ndhH        | 0.4787 | 0.1344 | 0.5052 | 0.1423 | 0.149 | -0.144 | 0.322 | 47.93        | 0.207 | 0.376 | 367  | 393  | -0.14758 | 0.114504 |
| ycf1        | 0.4823 | 0.1642 | 0.5514 | 0.1623 | 0.157 | -0.118 | 0.356 | 47.14        | 0.228 | 0.29  | 1808 | 1879 | -0.64396 | 0.121341 |

4

5

Table S3. List of species used for phylogenetic tree

|        |            |              |
|--------|------------|--------------|
| Family | Plant Name | NCBI Ref. No |
|--------|------------|--------------|

|                  |                                 |           |
|------------------|---------------------------------|-----------|
| Actinidiaceae    | <i>Actinidia kolomikta</i>      | NC_034915 |
|                  | <i>Actinidia tetramera</i>      | NC_031187 |
|                  | <i>Actinidia polygamya</i>      | NC_031186 |
|                  | <i>Clematoclethra scandens</i>  | KX345299  |
| Ebenaceae        | <i>Diospyros kaki</i>           | NC_030789 |
|                  | <i>Diospyros lotus</i>          | NC_030786 |
|                  | <i>Diospyros oleifera</i>       | NC_030787 |
|                  | <i>Diospyros glaucifolia</i>    | NC_030784 |
| Ericaceae        | <i>Arbutus unedo</i>            | JQ067650  |
|                  | <i>Pyrola rotundifolia</i>      | KU833271  |
|                  | <i>Vaccinium macrocarpon</i>    | JQ757046  |
| Lecythidaceae    | <i>Barringtonia fusicarpa</i>   | NC_035701 |
|                  | <i>Barringtonia racemose</i>    | NC_035705 |
| Pentaphylacaceae | <i>Adinandra angustifolia</i>   | NC_035653 |
|                  | <i>Adinandra millettii</i>      | NC_035678 |
|                  | <i>Anneslea fragrans</i>        | NC_035709 |
|                  | <i>Pentaphylax euryoides</i>    | NC_035710 |
|                  | <i>Ternstroemia gymnanthera</i> | NC_035706 |
| Primulaceae      | <i>Androsace bulleyana</i>      | NC_034641 |
|                  | <i>Ardisia polysticta</i>       | NC_021121 |
|                  | <i>Lysimachia coreana</i>       | NC_026197 |
|                  | <i>Maesa montana</i>            | KU569490  |
|                  | <i>Primula chrysochlora</i>     | NC_034678 |
|                  | <i>Primula persimilis</i>       | NC_034331 |
|                  | <i>Primula stenodonta</i>       | NC_034677 |
| Sapotaceae       | <i>Pouteria campechiana</i>     | NC_033501 |
| Sladeniaceae     | <i>Sladenia celastriifolia</i>  | NC_035707 |
| Styracaceae      | <i>Bruinsmia polysperma</i>     | NC_030180 |
|                  | <i>Melliodendron xylocarpum</i> | NC_035712 |
|                  | <i>Sinojackia xylocarpa</i>     | NC_035418 |
|                  | <i>Styrax grandifloras</i>      | NC_030539 |

|                                   |                                |           |
|-----------------------------------|--------------------------------|-----------|
| Symplocaceae                      | <i>Symplocos costaricana</i>   | NC_035708 |
|                                   | <i>Symplocos paniculata</i>    | NC_035702 |
| Theaceae                          | <i>Polyspora speciosa</i>      | NC_035643 |
|                                   | <i>Pyrenaria diospyricarpa</i> | NC_035704 |
|                                   | <i>Schima wallichii</i>        | NC_035546 |
|                                   | <i>Stewartia rostrate</i>      | NC_035698 |
|                                   | <i>Camellia yunnanensis</i>    | NC_022463 |
| Cornaceae (Outgroup Cornales)     | <i>Diplopanax stachyanthus</i> | NC_029750 |
|                                   | <i>Nyssa sinensis</i>          | KX904873  |
| Hydrangeaceae (Outgroup Cornales) | <i>Hydrangea luteovenosa</i>   | NC_035662 |
|                                   | <i>Hydrangea serrata</i>       | KU140669  |
